# Supplementary material for: Design of a biomimetic, small-scale artificial leaf surface for the study of environmental interactions
Source: publisher site journal article supplement (doi:10.3762/bjnano.13.83), 2022-09-13
Supplement: Additional file 1 [file 2190-4286-13-83-S1.pdf]

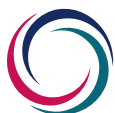

## Supporting Information

for

### **Design of a biomimetic, small-scale artificial leaf surface for the study of environmental interactions**

Miriam Anna Huth, Axel Huth, Lukas Schreiber and Kerstin Koch

*Beilstein J. Nanotechnol.* **2022**, *13*, 944–957. [doi:10.3762/bjnano.13.83](https://doi.org/10.3762/bjnano.13.83)

## Additional experimental data

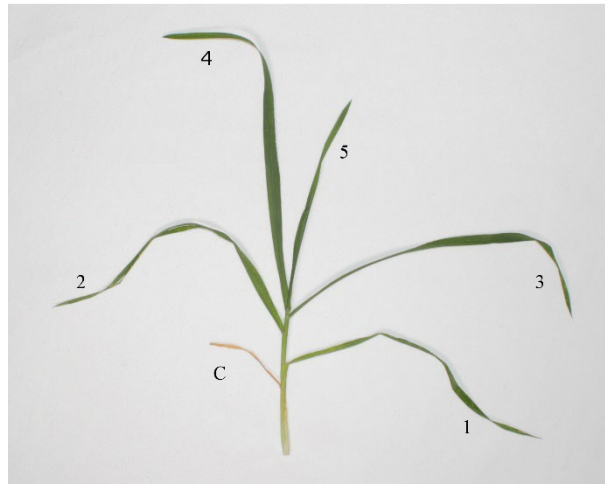

**Figure S1:** Harvested wheat plant at the five-leaf stage. C: cotyledon, 1–5: leaf 1–5; leaves used for the experiments: 2–4.

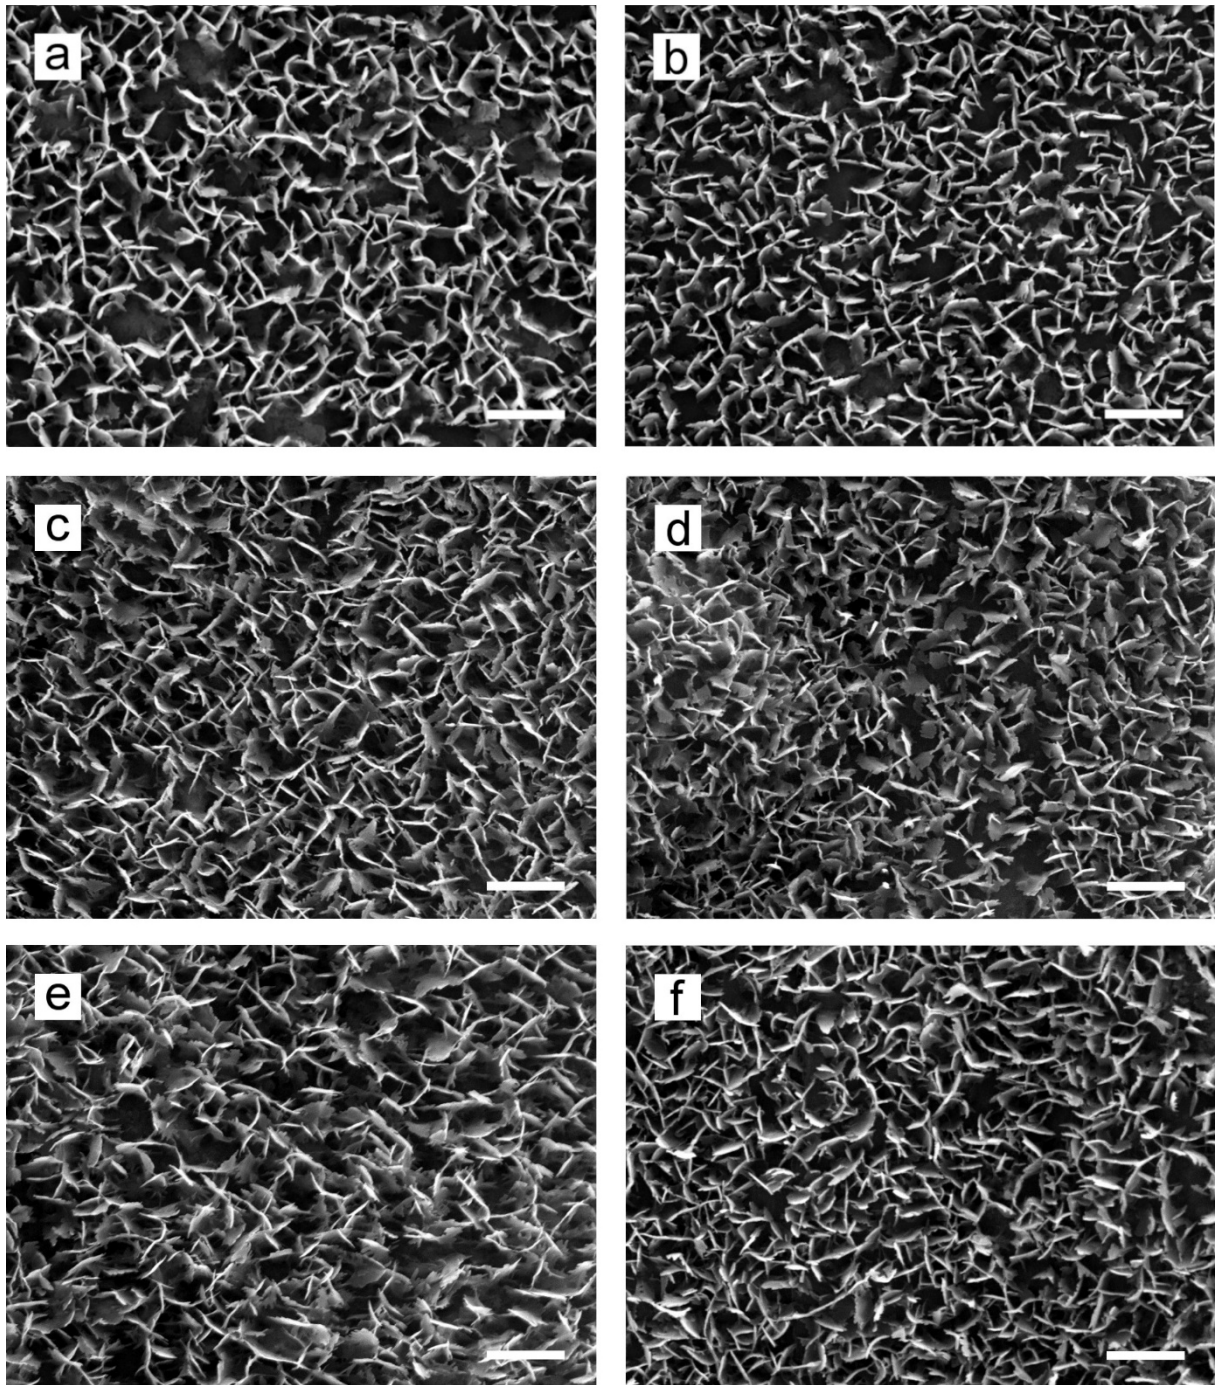

**Figure S2:** SEM micrographs of crystalline wax platelets on wheat leaves. (a) Upper (adaxial) side of leaf 2, (b) lower (abaxial) side of leaf 2, (c) upper side of leaf 3, (d) lower side of leaf 3, (e) upper side of leaf 4, (f) lower side of leaf 4; scale bars: 2  $\mu\text{m}$ .

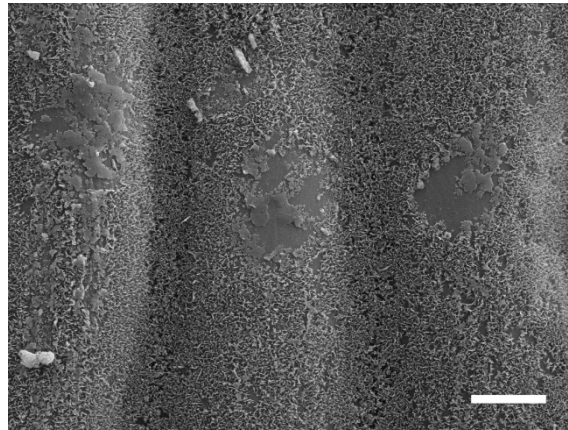

**Figure S3:** SEM micrograph of damage in the wax layer of a wheat leaf of an outdoor-cultivated plant. Scale bar: 10  $\mu\text{m}$ .

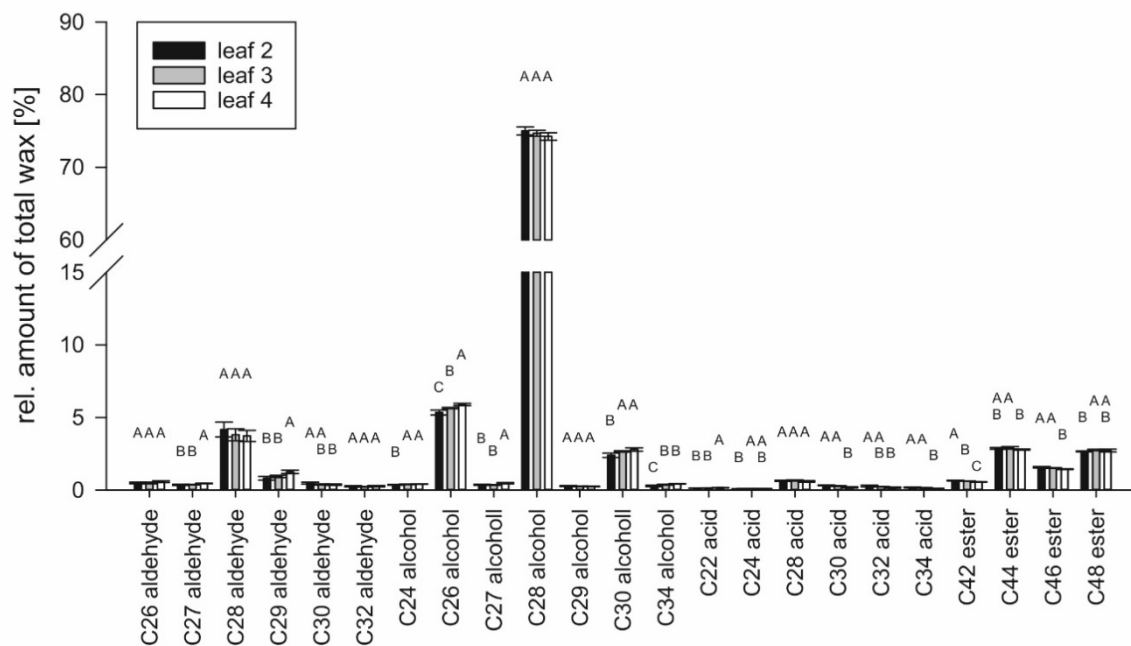

**Figure S4:** Chemical composition of wheat wax of leaves of different ages. Different letters indicate significant differences in the amounts of the wax components between leaves ( $p < 0.05$ , tested by an ANOVA test followed by a post hoc Tukey test).
